# Supplementary material for: Quantitative Analysis of Plasma Cell-Free DNA and Its DNA Integrity and Hypomethylation Status as Biomarkers for Tumor Burden and Disease Progression in Patients with Metastatic Neuroendocrine Neoplasias
Source: MDPI journal article supplement (doi:10.3390/cancers14041025), 2022-02-17
Supplement: s1 [file s1]

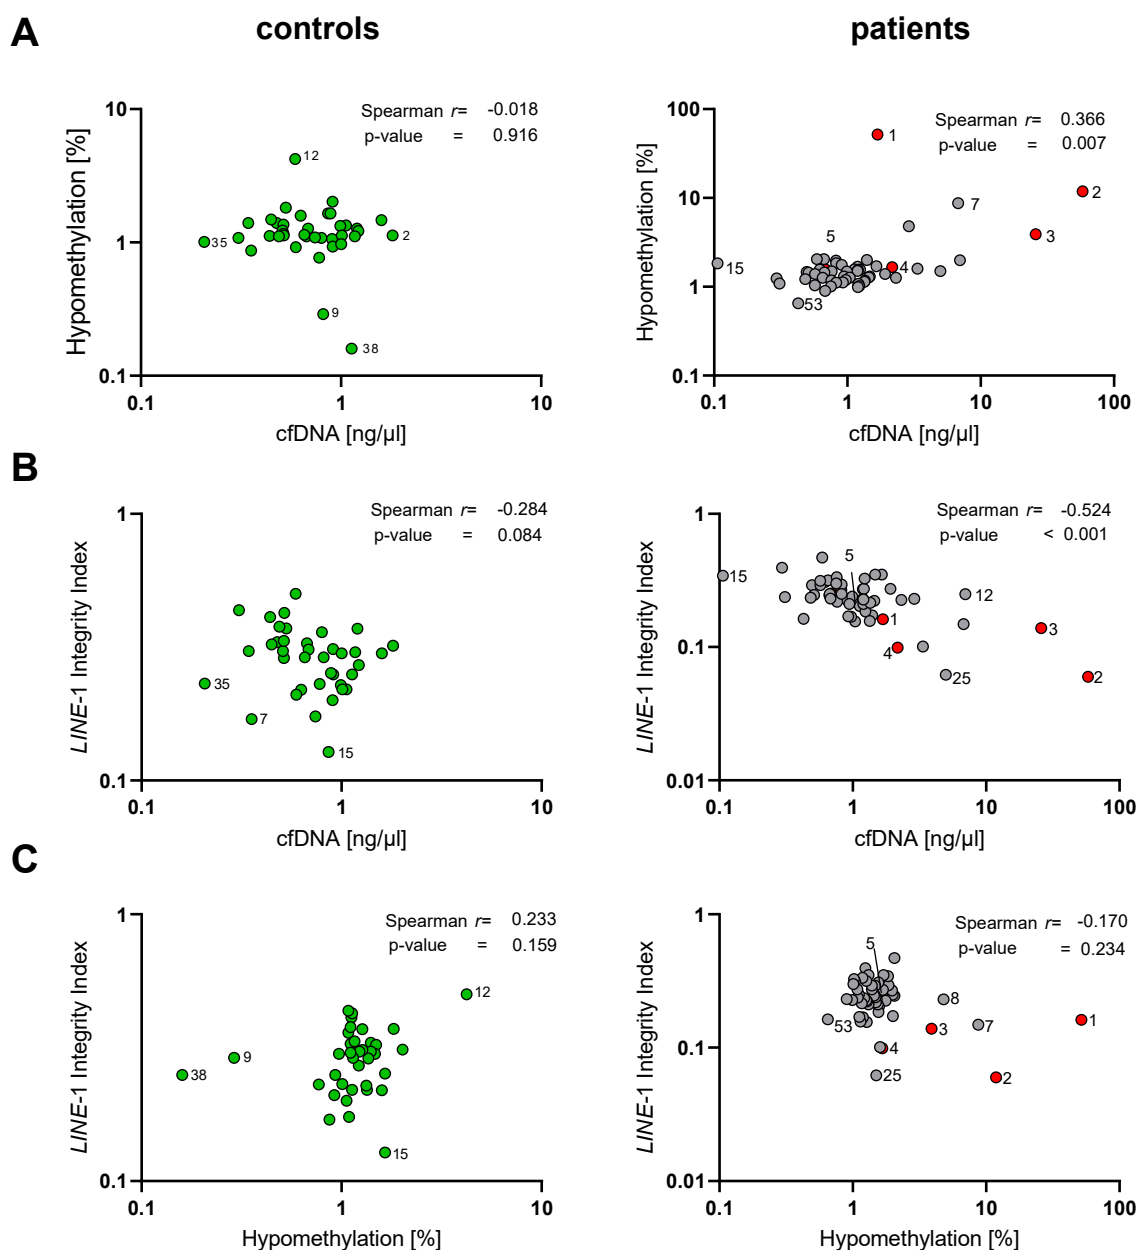

**Figure S1.** Scatter Plot and Spearman correlation analysis for (A) cfDNA concentration and *Alu*-hypomethylation, (B) cfDNA concentration and *LINE-1* integrity, and (C) *Alu* hypomethylation and *LINE-1* integrity of controls (green) and patients (grey). Deceased patients are marked in red color and outliers are tagged for identification.  $r$  = Spearman's correlation coefficient.

**Table S1:** Results of Spearman Correlation analysis of cfDNA characteristics with respect to age and gender, tumor differentiation, tumor grade, proliferation (Ki67-index), and current tumor treatment (watch and wait, SSA, PRRT, chemotherapy, immunotherapy, external radiation, and combination treatment).

| controls (n=38) |                |                        |                               |                            |
|-----------------|----------------|------------------------|-------------------------------|----------------------------|
|                 |                | cfDNA<br>concentration | <i>Alu</i><br>hypomethylation | <i>LINE-1</i><br>integrity |
| age             | Spearman's rho | 0.237                  | 0.036                         | -0.214                     |
|                 | p-value        | 0.153                  | 0.828                         | 0.198                      |
| gender          | Spearman's rho | 0.237                  | -0.179                        | -0.116                     |
|                 | p-value        | 0.153                  | 0.283                         | 0.488                      |
| patients (n=53) |                |                        |                               |                            |
|                 |                | cfDNA<br>concentration | <i>Alu</i><br>hypomethylation | <i>LINE-1</i><br>integrity |
| age             | Spearman's rho | 0.216                  | -0.145                        | 0.075                      |
|                 | p-value        | 0.12                   | 0.3                           | 0.596                      |
| gender          | Spearman's rho | -0.021                 | 0.025                         | -0.016                     |
|                 | p-value        | 0.881                  | 0.861                         | 0.909                      |
| differentiation | Spearman's rho | 0.047                  | 0.086                         | -0.133                     |
|                 | p-value        | 0.736                  | 0.542                         | 0.342                      |
| tumor grade     | Spearman's rho | 0.073                  | 0.195                         | -0.151                     |
|                 | p-value        | 0.612                  | 0.171                         | 0.291                      |
| ki67 [%]        | Spearman's rho | 0.13                   | 0.308                         | -0.011                     |
|                 | p-value        | 0.444                  | 0.064                         | 0.95                       |
| treatment       | Spearman's rho | -0.077                 | 0.166                         | -0.134                     |
|                 | p-value        | 0.581                  | 0.234                         | 0.338                      |

**Table S2:** Sensitivities and specificities of the ROC analysis of plasma cfDNA concentration, *Alu* hypomethylation, and *LINE-1* integrity with respect to tumor burden as shown in Figure 5.

|                                   |                       | healthy controls vs. patients | cured patients vs. patients |
|-----------------------------------|-----------------------|-------------------------------|-----------------------------|
| <b>cfDNA concentration</b>        |                       |                               |                             |
| low TB                            | sensitivity %         | 54.5                          | 40.9                        |
|                                   | specificity %         | 58.6                          | 88.9                        |
|                                   | cut off [pg/ $\mu$ l] | >0.78                         | >0.92                       |
| moderate TB                       | sensitivity %         | 78.3                          | 65.2                        |
|                                   | specificity %         | 58.6                          | 88.9                        |
|                                   | cut off [pg/ $\mu$ l] | >0.75                         | >0.93                       |
| high TB                           | sensitivity %         | 75                            | 87.5                        |
|                                   | specificity %         | 100                           | 77.8                        |
|                                   | cut off [pg/ $\mu$ l] | >1.64                         | >0.9                        |
| <b><i>Alu</i>-hypomethylation</b> |                       |                               |                             |
| low TB                            | sensitivity %         | 59                            | 68.2                        |
|                                   | specificity %         | 51.72                         | 88.9                        |
|                                   | cut off %             | >1.235                        | >1.15                       |
| moderate TB                       | sensitivity %         | 73.9                          | 86.9                        |
|                                   | specificity %         | 51.72                         | 88.9                        |
|                                   | cut off %             | >1.245                        | >1.135                      |
| high TB                           | sensitivity %         | 100                           | 100                         |
|                                   | specificity %         | 82.76                         | 100                         |
|                                   | cut off %             | >1.595                        | >1.5                        |
| <b><i>LINE-1</i> integrity</b>    |                       |                               |                             |
| low TB                            | sensitivity %         | 77.3                          | 86.4                        |
|                                   | specificity %         | 55.2                          | 44.4                        |
|                                   | cut off               | <0.293                        | <0.319                      |
| moderate TB                       | sensitivity %         | 73.9                          | 73.9                        |
|                                   | specificity %         | 62.07                         | 55.6                        |
|                                   | cut off               | <0.281                        | <0.282                      |
| high TB                           | sensitivity %         | 87.5                          | 87.5                        |
|                                   | specificity %         | 75.9                          | 66.7                        |
|                                   | cut off               | <0.231                        | <0.240                      |

**Table S3:** Multiparametric ROC analysis using cfDNA concentration and/or percentage of Alu-hypomethylation and/or LINE-1 integrity to estimate the strength of the model to discriminate between healthy controls or cured patients and NEN patients with low, moderate, and high tumor burden, with area under the curve (AUC), p-value, negative predictive power (NPP) [%], and positive predictive power (PPP) [%]. n.a.: not analyzed since not defined for the chosen cut-off of > 0.5.

| tumor burden                                                               |     | controls vs. patients |          |        | cured patients vs. patients |          |        |
|----------------------------------------------------------------------------|-----|-----------------------|----------|--------|-----------------------------|----------|--------|
|                                                                            |     | low                   | moderate | high   | low                         | moderate | high   |
| <b><i>Alu hypomethylation + LINE-1 integrity</i></b>                       | AUC | 0.661                 | 0.727    | 0.944  | 0.859                       | 0.928    | n.a.   |
|                                                                            | p   | 0.05                  | 0.0053   | 0.0001 | 0.002                       | 0.0002   | n.a.   |
|                                                                            | NPP | 62.86                 | 70       | 93.33  | 62.5                        | 70       | n.a.   |
|                                                                            | PPP | 56.25                 | 63.64    | 85.71  | 82.61                       | 90.9     | n.a.   |
| <b><i>cfDNA concentration + LINE-1 integrity</i></b>                       | AUC | 0.627                 | 0.784    | 0.849  | 0.566                       | 0.749    | 0.861  |
|                                                                            | p   | 0.123                 | 0.0005   | 0.0028 | 0                           | 0.0309   | 0.0124 |
|                                                                            | NPP | 58.97                 | 72.41    | 90.63  | n.a.                        | 60       | 100    |
|                                                                            | PPP | 50                    | 65.22    | 100    | 70.97                       | 77.78    | 81.82  |
| <b><i>cfDNA concentration + Alu hypomethylation</i></b>                    | AUC | 0.577                 | 0.762    | 0.884  | 0.818                       | 0.889    | n.a.   |
|                                                                            | p   | 0.351                 | 0.0013   | 0.001  | 0.006                       | 0.0007   | n.a.   |
|                                                                            | NPP | 59.57                 | 67.65    | 93.55  | 66.7                        | 70       | n.a.   |
|                                                                            | PPP | 75                    | 66.67    | 100    | 80                          | 90.9     | n.a.   |
| <b><i>cfDNA concentration + Alu hypomethylation + LINE-1 integrity</i></b> | AUC | 0.666                 | 0.795    | 0.931  | 0.864                       | 0.918    | n.a.   |
|                                                                            | p   | 0.0438                | 0.0003   | 0.0002 | 0.0017                      | 0.0003   | n.a.   |
|                                                                            | NPP | 61.76                 | 73.33    | 93.55  | 66.67                       | 75       | n.a.   |
|                                                                            | PPP | 52.94                 | 68.18    | 100    | 86.36                       | 87.5     | n.a.   |
